# Supplementary material for: Brief communication: Identification of 140 000-year-old blue ice in the Grove Mountains, East Antarctica, by krypton-81 dating
Source: Copernicus journal article supplement (doi:10.5194/tc-18-1647-2024), 2024-04-09
Supplement: Supplementary file 1 [file tc-18-1647-2024-supplement.pdf]

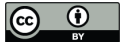

*Supplement of*

**Brief communication: Identification of 140 000-year-old blue ice in the Grove Mountains, East Antarctica, by krypton-81 dating**

**Zhengyi Hu et al.**

*Correspondence to:* Guitao Shi (gtshi@geo.ecnu.edu.cn)

The copyright of individual parts of the supplement might differ from the article licence.

Table S1 Stable isotopes of water in the snow and ice from different sites in Antarctica

| Sites                                           | $\delta^{18}\text{O}(\text{H}_2\text{O})$ /‰ | $\delta^2\text{H}(\text{H}_2\text{O})$ /‰ | Elevation/m | References              |
|-------------------------------------------------|----------------------------------------------|-------------------------------------------|-------------|-------------------------|
| Blue ice in Grove Mountains                     | -40.3                                        | -321.2                                    | ~2000       | This study              |
| Surface snow near Grove Mountains <sup>a)</sup> | -37.0±1.6                                    | -289±14.8                                 | 2556        | (Ma et al., 2020a)      |
| Dome A                                          | -58.5±2.3                                    | -449.4±17.0                               | 4089        | (Ma et al., 2020b)      |
| Dome A                                          | -58.4                                        | -450                                      | 4093        | (Xiao et al., 2008)     |
| Dome C                                          | -50.1                                        | -390                                      | 3240        | (Stenni et al., 2001)   |
| Vostok                                          | -56.4                                        | -440                                      | 3490        | (Ekaykin et al., 2004)  |
| Dome Fuji                                       | -54.9                                        | -425                                      | 3810        | (Watanabe et al., 2003) |
| Dome B                                          | -55.2                                        | -430                                      | 3650        | (Masson et al., 2000)   |

<sup>a)</sup> Surface snow samples were collected on the Chinese inland Antarctic expedition traverse route from Zhongshan Station to Dome A (Figure 1a), about 65 km from the Grove Mountains.

#### References:

- Ekaykin, A.A., Lipenkov, V.Y., Kuzmina, I.N., Petit, J.R., Masson-Delmotte, V., Johnsen, S.J., 2004. The changes in isotope composition and accumulation of snow at Vostok station, East Antarctica, over the past 200 years. *Ann. Glaciol.* 39, 569-575.
- Ma, T., Li, L., Li, Y., An, C., Yu, J., Ma, H., Jiang, S., Shi, G., 2020a. Stable isotopic composition in snowpack along the traverse from a coastal location to Dome A (East Antarctica): Results from observations and numerical modeling. *Polar Sci.* 24, 100510.
- Ma, T., Li, L., Shi, G., Li, Y., 2020b. Acquisition of Post-Depositional Effects on Stable Isotopes ( $\delta^{18}\text{O}$  and  $\delta\text{D}$ ) of Snow and Firn at Dome A, East Antarctica. *Water* 12, 1707.
- Masson, V., Vimeux, F., Jouzel, J., Morgan, V., Delmotte, M., Ciais, P., Hammer, C., Johnsen, S., Lipenkov, V.Y., Mosley-Thompson, E., 2000. Holocene climate variability in Antarctica based on 11 ice-core isotopic records. *Quaternary Res.* 54, 348-358.
- Stenni, B., Masson-Delmotte, V., Johnsen, S., Jouzel, J., Longinelli, A., Monnin, E., Röthlisberger, R., Selmo, E., 2001. An oceanic cold reversal during the last deglaciation. *Science* 293, 2074-2077.
- Watanabe, O., Kamiyama, K., Motoyama, H., Fujii, Y., Igarashi, M., Furukawa, T., Goto-Azuma, K., Saito, T., Kanamori, S., Kanamori, N., 2003. General tendencies of stable isotopes and major chemical constituents of the Dome Fuji deep ice core. *Memoirs of National Institute of Polar Research Special Issue No.57*. Tokyo: National Institute of Polar Research,.
- Xiao, C., Li, Y., Hou, S., Allison, I., Bian, L., Ren, J., 2008. Preliminary evidence indicating Dome A (Antarctica) satisfying preconditions for drilling the oldest ice core. *Chin. Sci. Bull.* 53, 102-106.
